# Supplementary material for: Assessment of Lentiviral Vector Mediated CFTR Correction in Mice Using an Improved Rapid in vivo Nasal Potential Difference Measurement Protocol
Source: PubMed Central journal article supplement (PMC8353152; doi:10.3389/fphar.2021.714452), 2021-07-27
Supplement: Image2.pdf [file Image2.pdf]

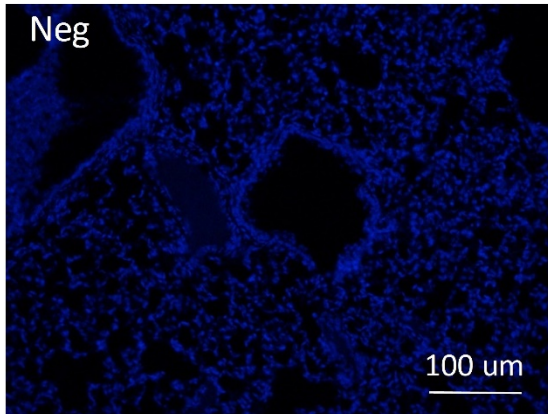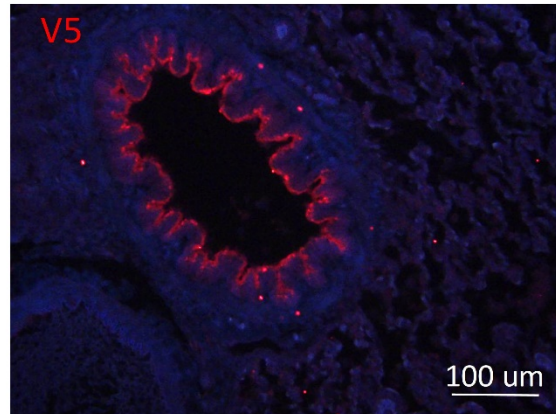

### Supplementary Figure 2. IHC Controls

Archival negative (Neg) and positive (V5) controls in rat lung bronchioles using IHC following delivery of CCL-V5-CFTR to rat lungs. All merged images (DAPI blue, V5 red).
